# Supplementary material for: Metatranscriptomic Identification of Diverse and Divergent RNA Viruses in Green and Chlorarachniophyte Algae Cultures
Source: MDPI journal article supplement (doi:10.3390/v12101180), 2020-10-19
Supplement: s1 [file s1]

## **SUPPLEMENTARY MATERIALS**

### ***SUPPLEMENTARY FILES***

**File S1.** Krona graphs obtained using the KMA and CCMetagen methods for the ALG\_1 library. Contigs without any match in the nt database are not shown. Each circle represents a taxonomic level. Entries are grouped and coloured based on their lowest rank taxonomic classification.

**File S2.** Krona graphs obtained using the KMA and CCMetagen methods for the ALG\_2 library. Contigs without any match in the nt database are not shown. Each circle represents a taxonomic level. Entries are grouped and coloured based on their lowest rank taxonomic classification.

**File S3.** Krona graphs obtained using the KMA and CCMetagen methods for the ALG\_3 library. Contigs without any match in the nt database are not shown. Each circle represents a taxonomic level. Entries are grouped and coloured based on their lowest rank taxonomic classification.

## SUPPLEMENTARY FIGURES

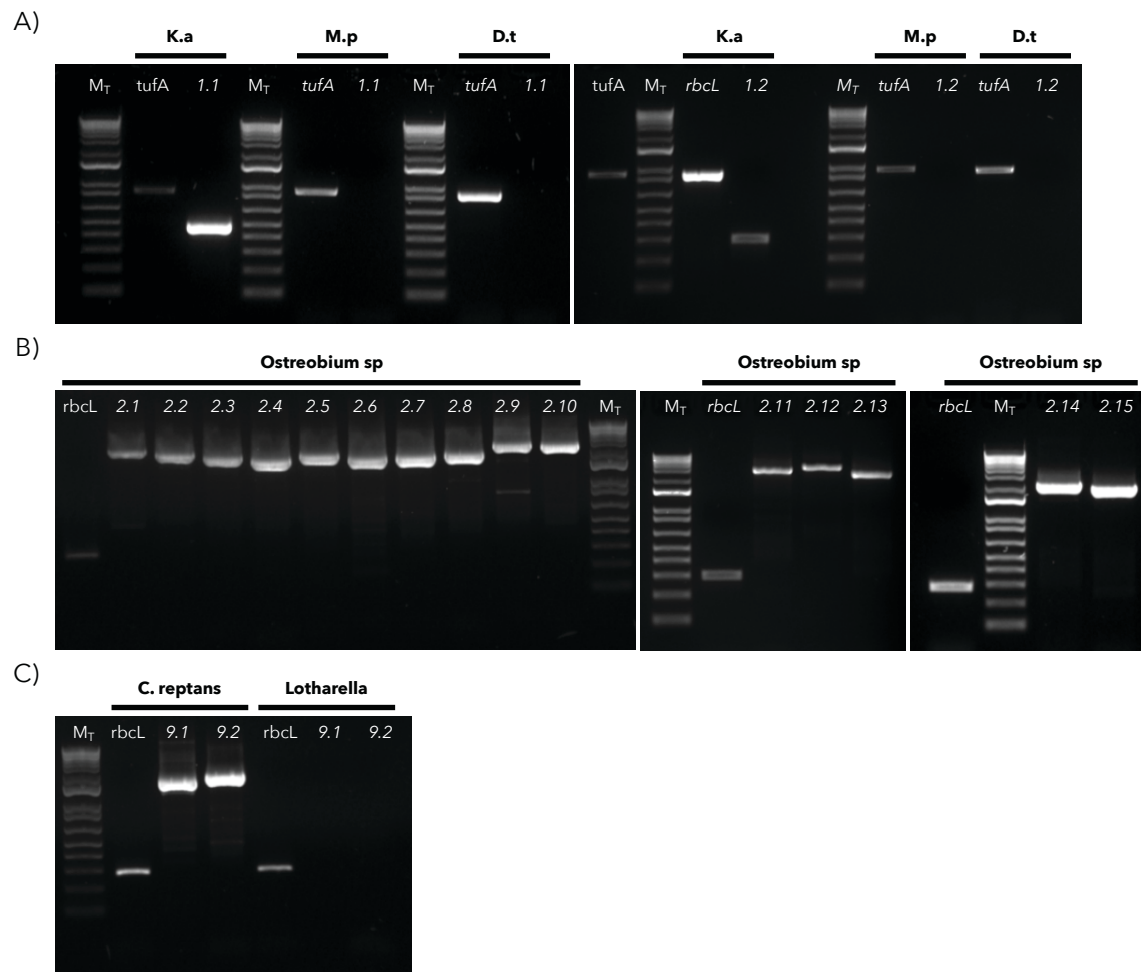

**Figure S1.** Gel electrophoresis of RT-PCR to validate the putative new RNA viruses in each sample used for library construction and RNA-seq. RT-PCR validation in (A) ALG\_1; (B) ALG\_2; and (C) ALG\_3. rbcL: ribulose-bisphosphate carboxylase gene, tufA: elongation factor Tu, both used as positive PCR-controls. K.a: *Kraftionema allantoideum*; M.p: *Microrhizoidea pickettheapsiorum*; D.t: *Dolichomastix tenuilepsis*. 1-9: virus tested (refer to Table S2 for virus name correspondences).

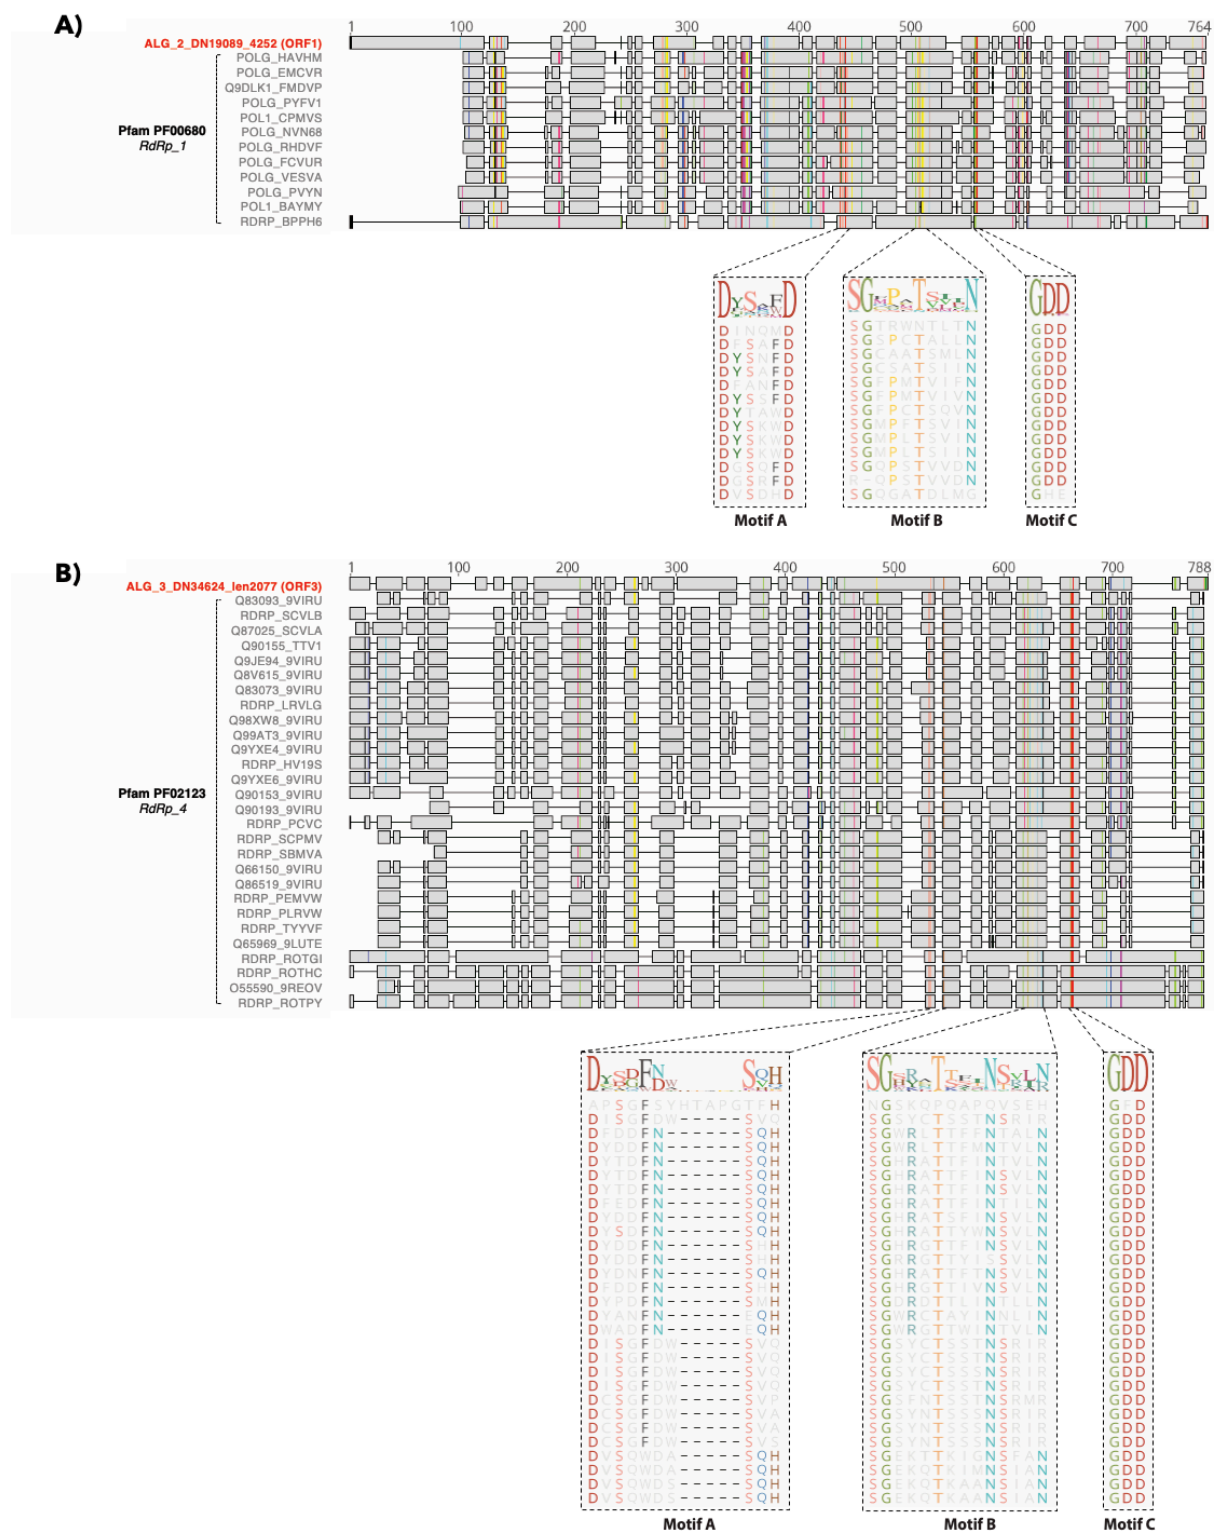

**Figure S2.** MAFFT alignment of the HMM-detected RdRp candidates with Pfam RdRp profiles. (A) Alignment of the ALG\_2\_DN19089-encoded ORF with the PFAM RdRp\_1 profile entries. (B) ALG\_3\_DN34624-encoded ORF with the PFAM RdRp\_4 profile entries. Coloured boxes represent the agreement with consensus. The dash boxes highlight the sequence logo and sequence alignment obtained at the three most conserved RdRp functional motifs. UniprotKB locus accessions of each RdRp used in the Pfam profiles are indicated on the left part of the alignments.

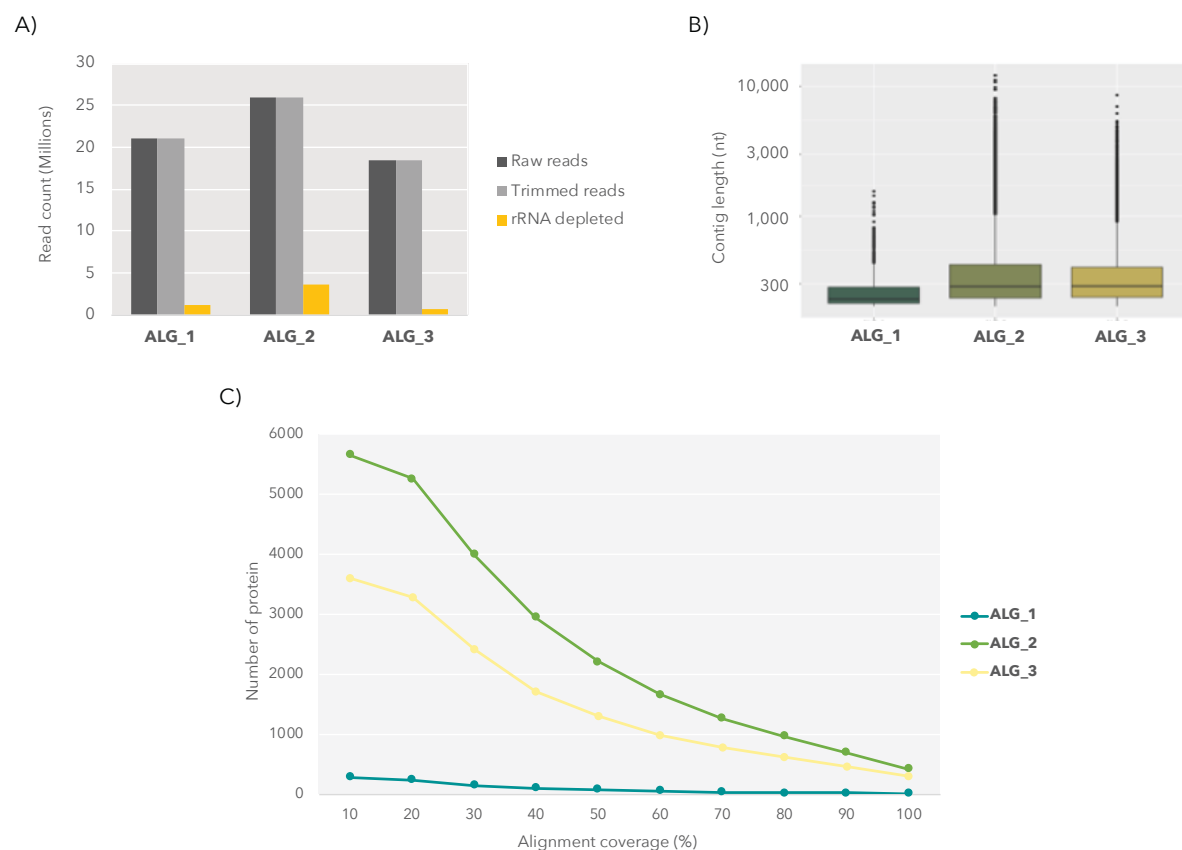

**Figure S3.** rRNA depletion and contig assembly results. (A) Read counts before and after trimming and SortmeRNA rRNA depletion. (B) Trinity assembly quality expressed as the average length of contig assembled for each library. (C) Comparison of full-length transcripts obtained in each library. Dots correspond to the number of top matching SwissProt database entries with coverage equal or higher than the x-value when align to library transcripts (corresponding to the “>bin\_below” value obtained with “analyze\_blastPlus\_topHit\_coverage.pl” script available in the Trinity v2.5.1 package).



**SUPPLEMENTARY TABLES**

**Table S1.** RNA-seq library preparation and sequencing results.

| Library ID | Library prep protocol                                      | Nb paired-end reads | Data yield (bp) |
|------------|------------------------------------------------------------|---------------------|-----------------|
| ALG_1      | SMARTer Stranded Total RNA-Seq Kit v2 Pico Input Mammalian | 21,014,207          | 5.30 Gb         |
| ALG_2      | TruSeq stranded/RiboZero gold                              | 25,963,002          | 6.54 Gb         |
| ALG_3      | SMARTer Stranded Total RNA-Seq Kit v2 Pico Input Mammalian | 18,448,371          | 4.65 Gb         |

**Table S2.** List of primers used in this study. tufA primers have been retrieved from ref.<sup>90</sup>. Ta: annealing temperature used in corresponding PCR reactions.

| Sequence ID                                    | Primer ID | Sequence                | Direction | Ta (°C) | Product Size |
|------------------------------------------------|-----------|-------------------------|-----------|---------|--------------|
| <b>Hypothetical amalga-like (ALG_1_DN2506)</b> | 1.1F      | CATTGCGTGAGTGGTATGCG    | forward   | 63      | 867          |
|                                                | 1.1R      | GTGCGCCTCTTAGCTATTGT    | reverse   |         |              |
| <b>Amalga-like boulavirus</b>                  | 1.2F      | CGCTCATTGCACTAAAGATGACA | forward   | 62      | 1112         |
|                                                | 1.2R      | TCAACCGTGTAAGGAGTTTGA   | reverse   |         |              |
| <b>Amalga-like chassivirus</b>                 | 2.1F      | GCTGCCGCTCACAATAGAGA    | forward   | 65      | 2616         |
|                                                | 2.1R      | GGGTAACGGGGTCCTGTATG    | reverse   |         |              |
| <b>Tombus-like chagrupourvirus</b>             | 2.2F      | CCAGCCGATTGATCTCGACA    | forward   | 65      | 2360         |
|                                                | 2.2R      | ATGGACTTGTAATGGGCGCA    | reverse   |         |              |
| <b>Amalga-like chaucrivirus</b>                | 2.3F      | GATTGACGCAGAACACGACG    | forward   | 65      | 2105         |
|                                                | 2.3R      | ACAGACTCCGCCTCGAGTAA    | reverse   |         |              |
| <b>Mito-like babylonusvirus</b>                | 2.4F      | CCTGAGGGCACTTCTGTGTT    | forward   | 65      | 2000         |
|                                                | 2.4R      | CCATCATACGTTGGCGGAGA    | reverse   |         |              |
| <b>Mito-like bionusvirus</b>                   | 2.5F      | AGCAGAAGGAGGTCTCGCTA    | forward   | 65      | 2311         |
|                                                | 2.5R      | TTTCGCTAAGGGGAACGACC    | reverse   |         |              |
| <b>Mito-like spartanusvirus</b>                | 2.6F      | GATCGCTCCGTCTACATGG     | forward   | 65      | 2032         |
|                                                | 2.6R      | TTTGACAGTCGGTACCGTC     | reverse   |         |              |
| <b>Mito-like laruketanusvirus</b>              | 2.7R      | TGCAAGCTTCCCACCTTGAT    | reverse   | 65      | 2070         |
|                                                | 2.7F      | GGAAAATCGCCAAAGCAGGG    | forward   |         |              |
| <b>Mito-like bobnusvirus</b>                   | 2.8R      | GGCCTTTTAGAAAGCCAGCG    | reverse   | 65      | 2154         |
|                                                | 2.8F      | CCGGATGCCTCTTACGTGAA    | forward   |         |              |
| <b>Amalga-like dominovirus</b>                 | 2.9F      | GTTGCTGAGGGTCTTGTCGA    | forward   | 65      | 2809         |
|                                                | 2.9R      | ACGATTTTCGAGACGCCTGT    | reverse   |         |              |

|                                       |        |                        |         |    |         |
|---------------------------------------|--------|------------------------|---------|----|---------|
| <b>Amalga-like<br/>lacheneauvirus</b> | 2.10F  | CTGGCAGCTACACACGAGAA   | forward | 65 | 2675    |
|                                       | 2.10R  | GCGAATCAGTTGTTCCCGGA   | reverse |    |         |
| <b>Partiti-like alassinovirus</b>     | 2.11F  | GGATGCGACCGTTGAATGC    | forward | 65 | 2867    |
|                                       | 2.11R  | TCACTAGGGCACTCCACGA    | reverse |    |         |
| <b>Partiti-like adriusvirus</b>       | 2.12F  | GGTTTGAACGCGGGGTAGA    | forward | 62 | 3357    |
|                                       | 2.12R  | TCCAATTCATCAGTGGGCA    | reverse |    |         |
| <b>Partiti-like lacotivirus</b>       | 2.13F  | TTTCAATGGCGGCGAGTCA    | forward | 65 | 2503    |
|                                       | 2.13R  | CGGCCATATCTTCATCGTCCA  | reverse |    |         |
| <b>Mito-like picolinusvirus</b>       | 2.14F  | CAGAACGTTGTCCGGCTTG    | forward | 65 | 2114    |
|                                       | 2.14R  | TCCCCGAACGTAAGGATCCT   | reverse |    |         |
| <b>Mito-like<br/>albercanusvirus</b>  | 2.15F  | CCGCGGCCCAATCAAATATG   | forward | 65 | 1973    |
|                                       | 2.15R  | CTGGGTAAAGCACGCATTTTCG | reverse |    |         |
| <b>Virga-like bellevillovirus</b>     | 9.1F   | AAGTTGTGTGATAGGGGGCG   | forward | 65 | 1741    |
|                                       | 9.1R   | TAAACATCCACACGCCGTCA   | reverse |    |         |
| <b>Bunya-like bridouvirus</b>         | 9.2F   | TGGCTGCACTAACCCTCATG   | forward | 65 | 2049    |
|                                       | 9.2R   | GCTGTGTGCTTGCATCCAA    | reverse |    |         |
| <b>rbcL</b>                           | rbcL_F | CGTGCDATGCAYGCNGTWAT   | forward | 63 | 275     |
|                                       | rbcL_R | TGCCAWACRTGAATACCACC   | reverse |    |         |
| <b>tufA</b>                           | tufA_F | GGNGCNGCNCAAATGGAYGG   | forward | 55 | 758-901 |
|                                       | tufA_R | CCTTCNCGAATMGCRAAWCGC  | reverse |    |         |



**Table S3.** RdRp-based pairwise sequence identity of the viruses newly identified here. Top: Amalga-like RdRp; Middle: BDRC-like RdRp; Bottom: Mitovirus-like RdRp.

| Amalga-like RdRp          | Amalga-like chassivirus | Amalga-like lacheneavirus | Amalga-like chaucrivirus | Amalga-like dominovirus |
|---------------------------|-------------------------|---------------------------|--------------------------|-------------------------|
| Amalga-like boulavirus    | 19                      | 21                        | 16                       | 16                      |
| Amalga-like chassivirus   | -                       | 47                        | 22                       | 20                      |
| Amalga-like lacheneavirus |                         | -                         | 22                       | 21                      |
| Amalga-like chaucrivirus  |                         |                           | -                        | 36                      |

| BDRC-like RdRp             | Partiti-like alassinivirus | Partiti-like lacotivirus |
|----------------------------|----------------------------|--------------------------|
| Partiti-like adriusvirus   | 20                         | 20                       |
| Partiti-like alassinivirus | -                          | 32                       |

| Mitovirus-like RdRp        | Mito-like picolinus virus | Mito-like babylonus virus | Mito-like albercanus virus | Mito-like laruketanus virus | Mito-like bobnus virus | Mito-like bionusvirus |
|----------------------------|---------------------------|---------------------------|----------------------------|-----------------------------|------------------------|-----------------------|
| Mito-like spartanusvirus   | 46                        | 19                        | 21                         | 21                          | 20                     | 15                    |
| Mito-like picolinusvirus   | -                         | 17                        | 20                         | 19                          | 19                     | 13                    |
| Mito-like babylonusvirus   |                           | -                         | 22                         | 22                          | 20                     | 14                    |
| Mito-like albercanusvirus  |                           |                           | -                          | 26                          | 25                     | 16                    |
| Mito-like laruketanusvirus |                           |                           |                            | -                           | 37                     | 14                    |
| Mito-like bobnusvirus      |                           |                           |                            |                             | -                      | 12                    |
